# Supplementary material for: Herpes Simplex Keratitis in Patients with SARS-CoV-2 Infection: A Series of Five Cases
Source: MDPI journal article supplement (doi:10.3390/medicina57050412), 2021-04-24
Supplement: s1 [file s1]

**Table S1.** The ophthalmic characteristics of patients positive for SARS-CoV-2 infection and diagnosed with herpes simplex virus-1 keratitis.

| Factor                                                                         |                                    |                     | Total cases |
|--------------------------------------------------------------------------------|------------------------------------|---------------------|-------------|
| The patients positive for SARS-CoV-2 by RT-PCR with herpes simplex-1 keratitis |                                    |                     | 18          |
| BCVA of the affected eye                                                       | Before treatment                   | 20/20 - 20/25       | 4           |
|                                                                                |                                    | 20/32 - 20/50       | 6           |
|                                                                                |                                    | 20/63 - 20/100      | 3           |
|                                                                                |                                    | 20/125 - 20/200     | 3           |
|                                                                                |                                    | Counting fingers    | 1           |
|                                                                                |                                    | Hand motion         | 0           |
|                                                                                |                                    | Light perception    | 1           |
|                                                                                |                                    | No light perception | 0           |
|                                                                                | After treatment                    | 20/20 - 20/25       | 12          |
|                                                                                |                                    | 20/32 - 20/50       | 3           |
|                                                                                |                                    | 20/63 - 20/100      | 1           |
|                                                                                |                                    | 20/125 - 20/200     | 1           |
|                                                                                |                                    | Counting fingers    | 0           |
|                                                                                |                                    | Hand motion         | 0           |
|                                                                                |                                    | Light perception    | 1           |
|                                                                                |                                    | No light perception | 0           |
| Length of treatment                                                            |                                    |                     |             |
|                                                                                | < 7 days                           | 0                   |             |
|                                                                                | 8-14 days                          | 2                   |             |
|                                                                                | 15-21 days                         | 5                   |             |
|                                                                                | 22- 28 days                        | 8                   |             |
|                                                                                | > 28 days                          | 3                   |             |
| COVID-19 RT-PCR test                                                           | Prior to HSV-1 keratitis diagnosis | > 14 days           | 2           |
|                                                                                |                                    | 14 - 8 days         | 3           |
|                                                                                |                                    | 7 - 3 days          | 4           |
|                                                                                |                                    | 2- 0 days           | 7           |
|                                                                                |                                    | 1-2 days            | 2           |

| Factor                          |             | Total cases |
|---------------------------------|-------------|-------------|
| After HSV-1 keratitis diagnosis | 3 - 7 days  | 0           |
|                                 | 7 - 14 days | 0           |
|                                 | > 14 days   | 0           |

*Note:* BCVA, best-corrected visual acuity; HSV-1, herpes simplex virus-1
